# Supplementary material for: Safety and efficacy of bariatric surgery in obesities class I vs. II in patients without diabetes: a matched control study from Tehran Obesity Treatment Study (TOTS)
Source: Research Square preprint supplement (doi:10.21203/rs.3.rs-4312540/v1), 2024-05-10
Supplement: Supplementary file 1 [file 049879fe85b4a93617f4c2c0.docx]

|  | **Table 1. Weight and body composition status in class I and II obesity groups** | | | | | | | | | | | | | |
| --- | --- | --- | --- | --- | --- | --- | --- | --- | --- | --- | --- | --- | --- | --- |
|  | **P value** | | **3 year** | | **2 year** | | **1 year** | | **6 months** | | **Initial** | |  | |
| **P**  **between** | **P interaction** | **P trend** | **Mean ± SD** | **n** | **Mean ± SD** | **n** | **Mean ± SD** | **n** | **Mean ± SD** | **n** | **Mean ± SD** | **n** |  | |
| 0.489 | 0.535 | 0.547 | 25.2±7.8 | 7 | 27.1±10.1 | 16 | 28.6±6.7 | 32 | 25.5±4.4 | 32 | - | - | **Class**  **I** | **TWL%** |
| 0.022 | 30.3±7.8 | 24 | 27.8±6 | 28 | 31.2±5.3 | 50 | 26±4.4 | 49 | - | - | **Class II** |
| <0.001 | 0.828 | <0.001 | 25.6±2.7 | 9 | 24.5±3.4 | 19 | 24.1±2.4 | 35 | 25±1.5 | 43 | 33.7±1 | 56 | **Class**  **I** | **BMI, kg/m2** |
| <0.001 | 26.9±3.3 | 25 | 27.3±2.4 | 28 | 26.3±2.1 | 55 | 28 ±1.9 | 56 | 38±1.5 | 70 | **Class II** |
| <0.001 | 0.493 | 0.775 | 94.3±30.5 | 7 | 104.3±42.1 | 16 | 112.5±28.6 | 32 | 101±19.8 | 32 | - | - | **Class**  **I** | **EWL, %** |
| 0.036 | 88.0±25.3 | 24 | 82.2±18 | 28 | 91.6±16.1 | 50 | 76.2±13.5 | 49 | - | - | **Class II** |
| 0.471 | 0.184 | <0.001 | 37.0±7.9 | 4 | 32.4±8.1 | 6 | 29.8±7.2 | 17 | 36.5±4 | 33 | 46.5±4.1 | 42 | **Class**  **I** | **FM%** |
| <0.001 | 39.6±4.3 | 9 | 37.3±3.8 | 11 | 35.3±6 | 39 | 37.4±6.2 | 50 | 47.6±4.1 | 60 | **Class II** |
| 0.001 | 0.851 | <0.001 | 42.2±5.3 | 4 | 41.8±4.9 | 6 | 43.9±4.7 | 16 | 43±4 | 33 | 48.2±4.4 | 41 | **Class**  **I** | **FFM, kg** |
| <0.001 | 41.5±4 | 8 | 46.3±5.4 | 11 | 44.8±6 | 39 | 46.6±7.1 | 50 | 51.6±6.3 | 60 | **Class II** |
| 0.937 | 0.103 | 0.604 | 30±11.9 | 2 | 11.4±6.8 | 3 | 18.6±11.1 | 14 | 22.5±7.7 | 15 | - | - | **Class**  **I** | **FFML/WL** |
| 0.011 | 28.4±9.3 | 7 | 32.8±9.5 | 10 | 22.7±9.5 | 33 | 23.7±9.7 | 34 | - | - | **Class II** |
| 0.001 | 0.682 | <0.001 | 25.1±6.6 | 4 | 21.1±8.6 | 6 | 19.3±5.6 | 17 | 24.7±3.4 | 33 | 42.3±4.5 | 42 | **Class**  **I** | **FM, kg** |
| <0.001 | 27.6±6.4 | 9 | 27.7±4.7 | 11 | 24.4±4.9 | 39 | 27.8±5.5 | 50 | 47.5±4.7 | 60 | **Class II** |
| 0.025 | 0.841 | <0.001 | 38.6±5.6 | 3 | 34.5±4.7 | 5 | 41.3±5.4 | 9 | 40.4±3.8 | 28 | 45.3±4 | 34 | **Class**  **I** | **Lean-mass, kg** |
| <0.001 | 38.3±2.5 | 2 | 42.8±7.7 | 5 | 41.9±4.8 | 15 | 44.3±8 | 22 | 49.7±8.6 | 24 | **Class II** |
|  | 0.369 | <0.001 | 71±8.7 | 9 | 68.5±10.6 | 19 | 66.4±7.2 | 35 | 67.7±5.7 | 43 | 91.7±6.5 | 56 | **Class**  **I** | **Weight, kg** |
| <0.001 | 69.5±10.1 | 25 | 74.2±9.4 | 28 | 70.3±8.5 | 55 | 74.7±7.5 | 56 | 101.4±10 | 70 | **Class II** |
| BMI, body mass index; FM, fat mass; FFM, fat-free mass; TWL, total weight loss; EWL, excess weight loss; FFML/WL, fat-free mass loss/ weight loss  Data are presented as mean ± SD or n (%) except for TG which has been presented as median (IQ 25-75) | | | | | | | | | | | | | | |
