# Supplementary material for: Safety and efficacy of bariatric surgery in obesities class I vs. II in patients without diabetes: a matched control study from Tehran Obesity Treatment Study (TOTS)
Source: Research Square preprint supplement (doi:10.21203/rs.3.rs-4312540/v1), 2024-05-10
Supplement: Supplementary file 2 [file 82906dae92fba3c3d3dabb3e.docx]

| **Table 5.** **Matched comparison of postoperative complications between obesity class I and II according to the Clavien-Dindo classification** | | | |
| --- | --- | --- | --- |
|  | **Class I**  (n =84) | **Class II**  (n =84) | **Clavien-Dindo grade** |
| **In-hospital,** n | | | |
| Vomiting | 5 | 3 | I |
| Bleeding | 2 | 1 | II |
| Pulmonary embolism | 0 | 0 | IVa |
| Abscess due to leak | 0 | 0 | IVb |
| **30-day,** n | | | |
| Vomiting | 1 | 0 | II |
| Bleeding | 0 | 0 | II |
| Other infection | 1 | 0 | II |
| **Late,** n | | | |
| Bleeding | 0 | 0 | II |
| Intestinal obstruction | 0 | 0 | III b |
| Gastroesophageal reflux | 0 | 1 | III b |
| **Clavien-Dindo classification** | **Class I** | **Class II** | *P*-value |
| Grade I | 5 | 3 | 0.720 |
| Grade II | 4 | 1 | 0.367 |
| Grade IIIa | 0 | 0 | - |
| Grade IIIb | 0 | 1 | >0.999 |
| Grade IVa | 0 | 0 | - |
| Grade IVb | 0 | 0 | - |
| Grade V | 0 | 0 | - |
| **Grade I,** Any deviation from the normal post-operative course not requiring surgical, endoscopic or radiological intervention. This includes the need for certain drugs (e.g. antiemetics, antipyretics, analgesics, diuretics and electrolytes), treatment with physiotherapy and wound infections that are opened at the bedside; **Grade II,** Complications requiring drug treatments other than those allowed for Grade I complications; this includes blood transfusion and total parenteral nutrition (TPN); **Grade III**, Complications requiring surgical, endoscopic or radiological intervention. Grade IIIa - intervention not under general anaesthetic. Grade IIIb - intervention under general anaesthetic; **Grade IV**, Life-threatening complications; this includes CNS complications (e.g. brain haemorrhage, ischaemic stroke, subarachnoid haemorrhage) which require intensive care, but excludes transient ischaemic attacks (TIAs). Grade IVa - single-organ dysfunction (including dialysis). Grade IVb - multi-organ dysfuncton; **Grade V,** Death of the patient | | | |
