# Supplementary material for: Safety and efficacy of bariatric surgery in obesities class I vs. II in patients without diabetes: a matched control study from Tehran Obesity Treatment Study (TOTS)
Source: Research Square preprint supplement (doi:10.21203/rs.3.rs-4312540/v1), 2024-05-10
Supplement: Supplementary file 3 [file 83249ed9a10119c7fe345853.docx]

| **Table 4 Multivariate linear regression analysis for delta change in different characteristics of the study population at 12 months post-operation** | | | | |
| --- | --- | --- | --- | --- |
|  |  | **12 months post-operation** | | |
|  | **Independent** | **Standardized β** | **β (SE)** | **P value** |
| **Δ BMI** | Class II | 0.43 | 2.16 (0.47) | < 0.001 |
| **Δ % TWL** | Class II | 0.17 | 1.69 (1.16) | 0.150 |
| **Δ % EWL** | Class II | 0.05 | 1.85 (4.37) | 0.673 |
| **Δ FM** | Class II | 0.07 | 0.72 (1.29) | 0.577 |
| **Δ %FM** | Class II | -0.29 | -2.90 (1.26) | 0.026 |
| **Δ FFM** | Class II | 0.15 | 1.20 (1.05) | 0.258 |
| **Δ %FFM** | Class II | 0.14 | 1.59 (1.49) | 0.291 |
| **Δ FFML/WL** | Class II | 0.20 | 3.48 (2.54) | 0.178 |
| **Δ HDL** | Class II | -0.24 | -4.86 (2.74) | 0.082 |
| **Δ LDL** | Class II | 0.04 | 3.16 (10.47) | 0.764 |
| **Δ TG** | Class II | 0.04 | 4.82 (17.10) | 0.779 |
| **Δ SBP** | Class II | -0.009 | -0.31 (4.68) | 0.947 |
| **Δ DBP** | Class II | 0.09 | 2.19 (3.24) | 0.501 |
| SBP, Systolic blood pressure; DBP, diastolic blood pressure; BMI, body mass index; FM, fat mass; FFM, fat-free mass; TWL, total weight loss; EWL, excess weight loss; FFML/WL, fat-free mass loss/ weight loss  Data are presented as mean ± SD or n (%) except for TG which has been presented as median (IQ 25-75) | | | | |
