# Supplementary material for: Safety and efficacy of bariatric surgery in obesities class I vs. II in patients without diabetes: a matched control study from Tehran Obesity Treatment Study (TOTS)
Source: Research Square preprint supplement (doi:10.21203/rs.3.rs-4312540/v1), 2024-05-10
Supplement: Supplementary file 4 [file 8dd12088428608998498246e.docx]

| **Table 3. Cardiovascular risk factors and co-morbidities associated with the outcomes of the study population in class I and II obesity groups** | | | | | |
| --- | --- | --- | --- | --- | --- |
| **variables** | **BMI Group** | **Pre-operation** | **Post-operation (12 months)** | **Change from 12th months of baseline, Mean ± SD or median (IQ)** | **p-value between group** |
| **HDL-C,** mg/dl | **Class I** | 50.4 ± 11.5 | 59.4 ± 12.9 | -8(-16,-3.9) | 0.015 |
| **Class II** | 48.6 ± 11.3 | 51.7 ± 8.9 | -6(-10.25,-0.75) |
| **LDL_C,** mg/dl | **Class I** | 119.2 ± 32.5 | 104.2 ± 33.2 | 13.4(-9.5,33) | 0.910 |
| **Class II** | 114.3 ± 32.3 | 105.2 ± 26.8 | 16(4.5,34.3) |
| **TG ,**mg/dl | **Class I** | 148 (106.5-220) | 82(65-102) | 52(17,109) | 0.870 |
| **Class II** | 151(102-194.75) | 83(62-107) | 60(46.5,95.5) |
| **SBP,** mmHg | **Class I** | 117.5 ± 8.4 | 108.9 ± 17.3 | 5(-10,21.25) | 0.459 |
| **Class II** | 119.7 ± 8.3 | 112.6 ± 9.4 | 5(0,15) |
| **DBP,** mmHg | **Class I** | 77.7 ± 5.7 | 72.9 ± 11.4 | 0(-6.25,15) | 0.902 |
| **Class II** | 78.1 ± 5.7 | 72.5 ± 8.3 | 0(0,10) |
| **Dyslipidemia,** n(%) | **Class I** | 73(86.9) | 8(50) | -36.9 | 0.503 |
| **Class II** | 73(86.9) | 21(60) | -26.9 |
| **HTN,** n %) | **Class I** | 6(7.1) | 3(21.4) | 14.3 | 0.024 |
| **Class II** | 6(7.1) | 1(2.6) | -4.5 |
| Dyslipidemia, (triglyceride ≥ 150 or using lipid-lowering medication; HDL, HDL-C < 40 in men and < 50 in women or using lipid-lowering medication); HTN, hypertension (Systolic blood pressure (SBP) ≥ 140 mmHg and/or diastolic blood pressure (DBP) ≥ 90 mmHg or taking antihypertensive medication; FPG, fasting plasma glucose; Diabetes mellitus, FPG ≥ 126 mg/dl or HBA1C ≥ 6.5 anti-diabetic medication use;  Data are presented as mean ± SD or n (%) except for TG which has been presented as median (IQ 25-75) | | | | | |
