# Supplementary material for: Safety and efficacy of bariatric surgery in obesities class I vs. II in patients without diabetes: a matched control study from Tehran Obesity Treatment Study (TOTS)
Source: Research Square preprint supplement (doi:10.21203/rs.3.rs-4312540/v1), 2024-05-10
Supplement: Supplementary file 5 [file 9cbd38ed41aa74952259e074.docx]

| **Supplementary Table 1 Baseline characteristics of class 1 obesity and a matched control group of class 2 obesity undergoing bariatric surgery** | | | | |
| --- | --- | --- | --- | --- |
| **P-value** | **BMI (35-40)**  **(n= 84)** | **BMI (30-35)**  **(n= 84)** | **Characteristics** | |
| 0.965 | 37.1±8.9 | 37.1 ±8.9 | **Age,** year | |
| >0.999 | 78 (92.9) | 78 (92.9) | **Sex (woman),** n (%) | |
| **<0.001** | 101.1±9.8 | 92.0±7.7 | **Weight,** kg | |
| **<0.001** | 37.9±1.5 | 33.6±1.2 | **BMI,** kg/m2 | |
| 0.088 | 119.7±8.3 | 117.5±8.4 | **SBP,** mmHg | |
| 0.635 | 78.1±5.7 | 77.7±5.7 | **DBP,** mmHg | |
| 0.325 | 48.6±11.3 | 50.4±11.5 | **HDL**, mg/dl | |
| 0.349 | 114.3±32.3 | 119.0±32.5 | **LDL,** mg/dl | |
| 0.699 | 94.4±10.3 | 95.1±9.6 | **FPG,** mg/dl | |
| 0.901 | 5.3±0.5 | 5.3±0.5 | **Hb-A1c,** % | |
| 0.346 | 195.4±35.5 | 200.9±38.5 | **Cholesterol**, mg/dl | |
| 0.658 | 151 (102, 194.75) | 148 (106, 220) | **TG,** mg/dl | |
| 0.999 | 73 (86.9) | 73 (86.9) | **Dyslipidemia,** n (%) | |
| 0.999 | 6 (7.1) | 6 (7.1) | **HTN,** n (%) | |
| 0.999 | 78 (92.9) | 78 (92.9) | **SG** | **Surgery,** n (%) |
| 6 (7.1) | 6 (7.1) | **GB** |
| BMI, body mass index; FPG, fasting plasma glucose; TG, triglyceride; HDL, high-density lipoprotein SG, sleeve gastrectomy; GB gastric bypass  Dyslipidemia, (triglyceride ≥ 150 or using lipid-lowering medication; HDL, HDL-C < 40 in men and < 50 in women or using lipid-lowering medication); HTN, hypertension (Systolic blood pressure (SBP) ≥ 140 mmHg and/or diastolic blood pressure (DBP) ≥ 90 mmHg or taking antihypertensive medication. Data are presented as mean ± SD or n (%) except Triglyceride and HbA1c which are presented as median (IQ 25–75) | | | | |
