# Supplementary material for: Safety and efficacy of bariatric surgery in obesities class I vs. II in patients without diabetes: a matched control study from Tehran Obesity Treatment Study (TOTS)
Source: Research Square preprint supplement (doi:10.21203/rs.3.rs-4312540/v1), 2024-05-10
Supplement: Supplementary file 6 [file a74ca2a9f7aefea5359d574b.docx]

| **Table 2. Nutritional and hematologic status of class I and II obesity groups** | | | | | | | | |
| --- | --- | --- | --- | --- | --- | --- | --- | --- |
| **Change from 12th months of baseline** | ***P between*** | ***P interaction*** | ***P trend*** | **Post-operation (12 months)** | **Pre-operation (Baseline)** | **Number** |  | |
| 0.1 (0,0.2) | 0.380 | 0.395 | 0.022 | 4.2±0.3 | 4.4±0.3 | 11 | **Class I** | **Albumin,** g/dl |
| -0.02 (-0.3,0.3) | 0.339 | 4.3±0.2 | 5.5±5 | 15 | **Class II** |
| 0 | 0.120 | 0.363 | >0.999 | 4 (25) | 4 (25) | 16 | **Class I** | **Anemia,** n (%) |
| 11.1 | 0.162 | 7 (19.4) | 3 (8.3) | 36 | **Class II** |
| -0.2 (-0.25,0.4) | 0.468 | 0.402 | 0.560 | 9.1±0.2 | 9.2±0.5 | 17 | **Class I** | **Calcium,** mg/dl |
| -0.1 (-0.7,0.5) | 0.536 | 9.4±0.5 | 9.3±0.4 | 31 | **Class II** |
| -12(-48,6) | 0.330 | 0.955 | 0.554 | 96.6±37.2 | 87.8±55.7 | 13 | **Class I** | **Iron,** g/dl |
| -8(-32,12.5) | 0.378 | 82.2±46.1 | 72.3±25.7 | 21 | **Class II** |
| 8.3 (-2.3,19.0) | 0.729 | 0.677 | 0.595 | 27.8 (11.2, 60.1) | 30 (18.6, 81.15) | 13 | **Class I** | **Ferritin,** ng/ml |
| -3.8 (-20.1,15.2) | 0.971 | 32 (17, 79.7) | 42 (27, 72) | 23 | **Class II** |
| 0.35 (-0.07,1.2) | 0.776 | 0.399 | **0.019** | 12.701.5 | 13.3± 1.8 | 16 | **Class I** | **Hb,** g/dl |
| 0.4 (-0.1,0.1) | 0.052 | 13.1±1.5 | 13.5 ± 1.2 | 36 | **Class II** |
| 7.6 | 0.503 | 0.742 | 0.560 | 7 (53.8) | 6 (46.2) | 13 | **Class I** | **Iron-deficiency,** n (%) |
| 13 | 0.249 | 11 (47.8) | 8 (34.8) | 23 | **Class II** |
| 0 | 0.204 | 0.899 | >0.999 | 1 (7.7) | 1 (7.7) | 13 | **Class I** | **Vitamin B12 deficiency,** n (%) |
| -3.7 | 0.654 | 6 (22.2) | 7 (25.9) | 27 | **Class II** |
| -49 (-200.5,11.4) | 0.285 | 0.515 | **0.013** | 288 (246, 517) | 272 (175, 310) | 13 | **Class I** | **Vit-B12,** pg/ml |
| -64 (-465,2.6) | 0.184 | 333.6 (161, 525) | 227.9 (159, 400) | 27 | **Class II** |
| -13.4 | 0.162 | 0.551 | 0.315 | 2 (13.3) | 4 (26.7) | 15 | **Class I** | **Vitamin D deficiency,** n (%) |
| -30.3 | **0.002** | 6 (18.2) | 16 (48.5) | 33 | **Class II** |
| -3.6 (-23.1,4.9) | 0.369 | 0.263 | 0.099 | 31 (22.8, 44.1) | 25 (19.4, 32) | 15 | **Class I** | **Vitamin D,** ng/ml |
| -13. 5 (-24.9,0.6) | **<0.001** | 30.2 (22.5, 49.5) | 21.9 (9.6, 31.3) | 33 | **Class II** |
| Data are presented as mean ± SD or n (%) except for TG, Vitamin D, B12, and ferritin which has been presented as median (IQ 25-75) | | | | | | | | |
